# Supplementary material for: Microwave-assisted synthesis of La–Cr co-doped SrTiO3 nano-particles and their use in photocatalytic hydrogen evolution under visible light
Source: Royal Society of Chemistry journal article supplement (doi:10.1039/c5ra04659a), 2015-01-01
Supplement: c5ra04659a1.pdf [file c5ra04659a1.pdf]

## Electronic Supplementary Material (ESI)

### Microwave-assisted Synthesis of La-Cr co-doped SrTiO<sub>3</sub> and Their Photocatalytic Hydrogen Evolution under Visible Light

*Fanpeng Cai,<sup>a, b</sup> Yadong Meng,<sup>b</sup> Bo Hu,<sup>b</sup> Yubin Tang,<sup>a</sup> Weidong Shi,<sup>b, \*</sup>*

<sup>a</sup> School of Biology and Chemical Engineering, Jiangsu University of Science and  
Technology, Zhenjiang, 212003, P. R. China.

<sup>b</sup> School of Chemistry and Chemical Engineering, Jiangsu University, Zhenjiang,  
212013, P. R. China.

*\*Corresponding author: Tel.: +86 511 8879 0187; Fax. : +86 511 8879 1108*

*E-mail address: [swd1978@ujs.edu.cn](mailto:swd1978@ujs.edu.cn)(W. Shi)*

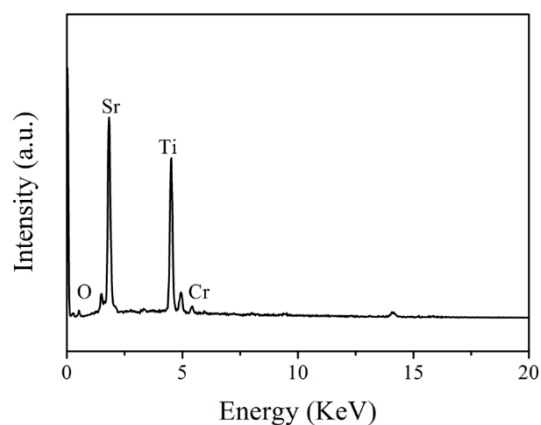

Fig S1 The EDS image of Cr-5.

Table S1. The table of the element content.

| Element      | Weight percent | Atom Percent |
|--------------|----------------|--------------|
| O K          | 7.91           | 26.21        |
| Ti K         | 34.73          | 38.43        |
| Cr K         | 1.63           | 1.67         |
| Sr L         | 55.72          | 33.70        |
| Total weight | 100.00         |              |

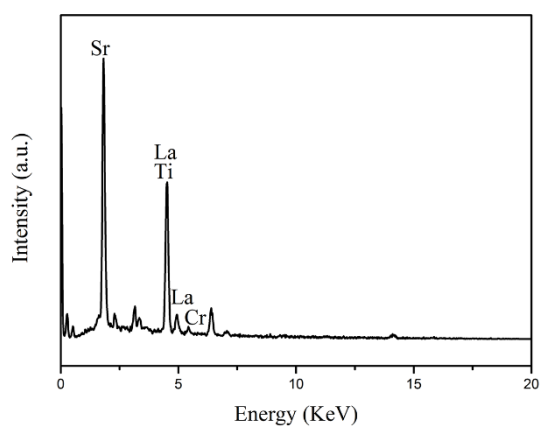

Fig S2 The EDS image of La-Cr-5.

Table S2 The table of the element content.

| Element      | Weight percent | Atom Percent |
|--------------|----------------|--------------|
| O K          | 10.64          | 32.87        |
| Ti K         | 34.35          | 35.45        |
| Cr K         | 1.68           | 1.60         |
| La M         | 2.46           | 1.90         |
| Sr L         | 50.87          | 28.18        |
| Total weight | 100.00         |              |

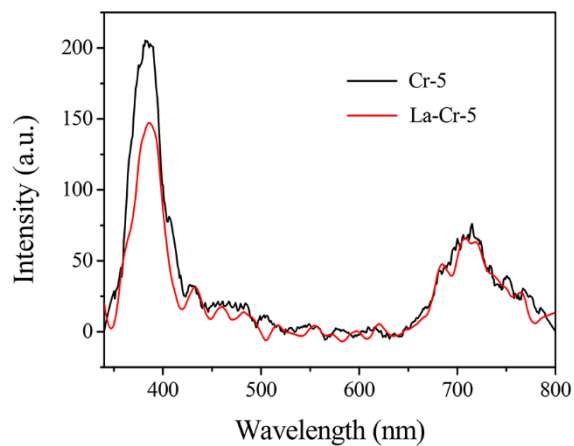

Fig. S3 The photoluminescence spectra of Cr-5 and Cr-La-5

The photoluminescence spectra of Cr-5 and Cr-La-5 have been provide in the revised manuscript, and the Figure also list below, in comparison with Cr-5, La-Cr-5, the intensity of the PL signal for La-Cr-5 is much lower, This indicates that the La-Cr-5 has a lower recombination rate of electrons and holes under visible-light irradiation, which means the photocatalytic performance of La-Cr-5 is better than that of Cr-5.
